# Supplementary material for: Cu2O sensitized flexible 3D-TiO2 nanotube arrays for enhancing visible photo-electrochemical performance
Source: Royal Society of Chemistry journal article supplement (doi:10.1039/c6ra11341a), 2016-01-01
Supplement: c6ra11341a1.pdf [file c6ra11341a1.pdf]

## Electronic Supplementary Information

### Cu<sub>2</sub>O sensitized flexible 3D-TiO<sub>2</sub> nanotube arrays for enhancing visible photo-electrochemical performance

Xiuchun Yang<sup>a,b\*</sup> and Chao Chen<sup>a</sup>

a. Key Laboratory of Advanced Civil Engineering Materials (Tongji University), Education of Ministry, Shanghai 201804, People's Republic of China; b. School of Materials Science and Engineering, Tongji University, Shanghai, 200092, People's Republic of China. E-mail: [yangxc@tongji.edu.cn](mailto:yangxc@tongji.edu.cn).

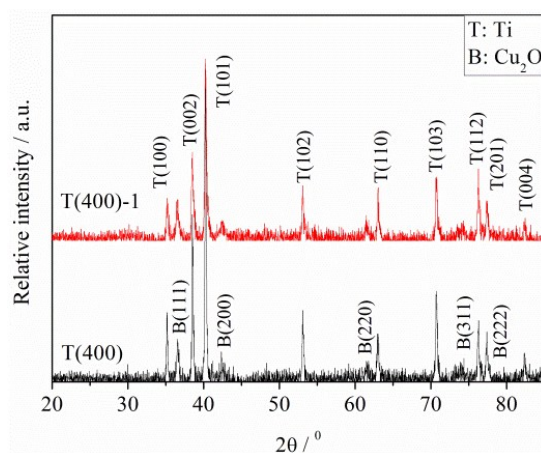

Fig.S1. The XRD patterns of samples T(400) and T(400)-1, T(400): Cu<sub>2</sub>O was electrochemically deposited on blank Ti mesh with 400 pulse cycles, T(400)-1: after degradation experiment of sample T(400) under simulated sunlight illumination for 4h.

Fig.S1 indicates that five peaks appear at 36.52°, 42.42°, 61.55°, 73.73° and 77.61° in the samples T(400) and T(400)-1 besides Ti peaks, which can be assigned to (111), (200), (220), (311) and (222) crystal faces of cubic Cu<sub>2</sub>O (JCPDS, card no: 77-0199), T(400) and T(400)-1 have nearly the same Cu<sub>2</sub>O peak position and intensity, indicating that Cu<sub>2</sub>O is stable after the degradation experiment. No CuO diffraction peak is found in these samples.

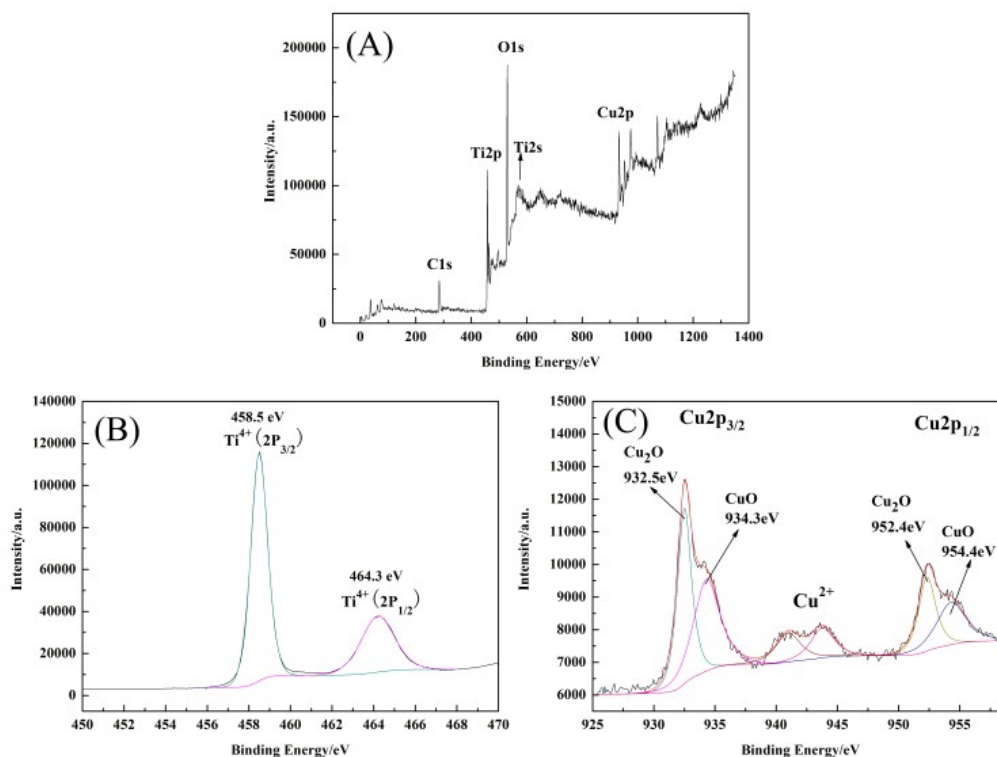

Fig.S2. The XPS spectra of CT(400): XPS survey spectrum (A), high resolution XPS spectra of Ti2p (B) and Cu2p (C)

Fig.S2 gives the XPS spectra of CT(400) in order to further clarify the chemical states of Cu. Fig.S2(A) indicates that the sample contains Cu, Ti, O and C elements. The small amount of carbon could have resulted from adventitious hydrocarbons from the XPS instrument itself and can be taken as the standard signal for the correction of other peaks. The binding energy of the superfluous carbon in our detection is C 1s = 284.8 eV, the same as the standard value. Fig.S2(B) indicates that two main peaks exist at bonding energies of 458.5 and 464.3 eV, which are consistent with that of Ti<sup>4+</sup> 2p<sub>3/2</sub> and Ti<sup>4+</sup> 2p<sub>1/2</sub>, respectively. [1,2] Fig.S2(C) indicates the existence of Cu 2p<sub>3/2</sub> and Cu 2p<sub>1/2</sub>. Peak Cu 2p<sub>3/2</sub> can be fitted by two peaks at 934.3 and 932.5 eV, which can be assigned to the Cu(II)[3] state and the Cu(I)[4] state, respectively. Similarly, Peak Cu 2p<sub>1/2</sub> can be fitted by two peaks at 952.4 and 954.4 eV, which can be assigned to the Cu(II)[3] state and the Cu(I)[4] state, respectively. The shakeup satellite peaks around 940.5 and 944.5 eV suggest the existence of fully oxidized Cu<sup>2+</sup>. [5] The existence of Cu<sup>2+</sup> ions indicate that the surface of Cu<sub>2</sub>O in 3D TiO<sub>2</sub> NTAs was partially oxidized into CuO, but its concentration is very low since no CuO diffraction peak is found in the XRD diagram of CT(400) in Fig.5(A).

## References

- 1 H. Tian, L. Hu, and C. Zhang, *J. Phys. Chem. C*, 2010, **114**, 1627;
- 2 J.L. Cao, G.S. Shao, and T.Y. Ma, *J. Mater. Sci.*, 2009, **44**, 6717;
- 3 J. P. Espinós, J. Morales, and A. Barranco, *J. Phys. Chem. B*, 2002, **106**, 6921;
- 4 K. Borgohain, N. Murase, and S. Mahamuni, *J. Appl. Phys.*, 2002, **92**, 1292;
- 5 C.C. Chusuei, M.A. Brookshier, and D.W. Goodman, *Langmuir*, 1999, **15**, 2806;
